# Supplementary material
Source: PubMed Central journal article supplement (PMC5971616)
Supplement: AAC.00111-18_zac006187198s1.pdf [file AAC.00111-18_zac006187198s1.pdf]

| Suppl. Table 1. $\theta$ -defensin content in rhesus macaque saliva (ng/ml) |          |     |       |       |       |       |       |        |
|-----------------------------------------------------------------------------|----------|-----|-------|-------|-------|-------|-------|--------|
| Animal ID                                                                   | Age (yr) | Sex | RTD-1 | RTD-2 | RTD-3 | RTD-4 | RTD-5 | RMAD-1 |
| 28392                                                                       | 5        | M   | 56.2  |       |       |       | 10.2  | 241.1  |
| 27229                                                                       | 6        | M   | 15.2  |       |       |       |       | 184.0  |
| 27230                                                                       | 6        | F   | 24.2  |       |       |       |       | 132.7  |
| 30676                                                                       | 5        | M   | 31.6  |       | 10.9  |       |       | 326.9  |
| 27944                                                                       | 5        | M   | 23.0  |       | 11.7  |       |       | 261.5  |
| 25622                                                                       | 8        | F   | 63.3  |       | 18.9  |       |       | 251.3  |
| 25793                                                                       | 8        | F   | 24.8  |       |       |       |       | 197.4  |
| 29188                                                                       | 4        | F   | 53.0  |       | 8.9   |       |       | 193.3  |
| 28234                                                                       | 5        | F   | 34.1  |       |       |       |       | 29.5   |
| 26169                                                                       | 8        | M   | 40.4  | 10.6  | 12.0  |       |       | 816.4  |
| 26109                                                                       | 8        | F   | 16.4  |       | 3.2   | 7.0   |       | 525.5  |
| 28026                                                                       | 5        | M   | 11.2  |       | 1.4   |       |       | 145.0  |
| 28108                                                                       | 5        | F   | 26.5  |       |       |       |       | 87.3   |
| 25549                                                                       | 8        | M   | 42.6  |       |       |       |       | 108.6  |
| 25507                                                                       | 9        | M   | 26.7  |       |       |       | 6.7   | 29.7   |
| 27228                                                                       | 6        | M   | 41.5  |       |       |       |       | 5.5    |
| 26106                                                                       | 8        | M   | 16.5  |       |       |       |       | 245.8  |
| 28392                                                                       | 5        | F   | 12.8  |       |       |       |       | 67.2   |
| 27230                                                                       | 6        | F   | 17.6  |       |       |       |       | 237.8  |

**Table S1** Salivary  $\theta$ -defensins in adult rhesus macaques. Peptide content was determined by UPLC/MS (Material and Methods). RMAD-1, an  $\alpha$ -defensin expressed in rhesus macaque leukocytes, was quantified for comparison.
